# Supplementary material for: Assessing the Impact of Meteorological Factors on COVID-19 Seasonality in Metropolitan Chennai, India
Source: MDPI journal article supplement (doi:10.3390/toxics10080440), 2022-08-01
Supplement: s1 [file s1]

# Supplementary Materials: Assessing the Impact of Meteorological Factors on COVID-19 Seasonality in Metropolitan Chennai, India

Thodhal Yoganandham Suman, Rajendiran Keerthiga, Rajan Renuka Remya, Amali Jacintha and Junho Jeon

**Table S1.** Summary of recent seasonal studies related to COVID-19.

| Study (Area)                                 | Period                            | Pollutant type                                                             | Key observation                                                                                       | Reference |
|----------------------------------------------|-----------------------------------|----------------------------------------------------------------------------|-------------------------------------------------------------------------------------------------------|-----------|
| Brazil                                       | February 25 to November 15, 2020  | Temperature, humidity, wind speed and precipitation                        | Cold, dry and windless conditions aggravated COVID-19 transmission.                                   | 11        |
| Brazil, Argentina, South Africa, Peru, Chile | March to November 2020            | Metrological factors and air pollution                                     | Cold season<br>8.72% increase of the total infections, warm season to a $46.38 \pm 29.10\%$ reduction | 12        |
| Wuhan, Beijing, Urumqi and Dalian            | 8 December 2019-24 October 2020   | Temperature, relative humidity, average wind speed and total precipitation | Temperature and relative humidity were mainly the driving factors on COVID-19 transmission,           | 13        |
| 54 English cities                            | 30th January to October 31, 2020. | Temperature, absolute humidity, and relative humidity                      | Humidity exhibited elevated risk                                                                      | 14        |

**Table S2.** An overview of cases between Summer -March 2020-June 2020), Rainy -July 2020-October 2020), c) Winter - November 2020-February 2021, d) Summer -March 2020-April 2021 in Chennai, India.

|                    | March-June 2020(Summer) | July-October 2020(Rainy) | November 2020-February 2021 (Winter) | March-April 2021 (Summer) |
|--------------------|-------------------------|--------------------------|--------------------------------------|---------------------------|
| Number of values   | 122                     | 123                      | 120                                  | 37                        |
| Minimum            | 0.000                   | 0.000                    | 134.0                                | 229.0                     |
| 25% Percentile     | 7.000                   | 986.0                    | 156.3                                | 334.5                     |
| Median             | 312.5                   | 1130                     | 232.0                                | 664.0                     |
| 75% Percentile     | 1083                    | 1250                     | 351.5                                | 1297                      |
| Maximum            | 2393                    | 1369                     | 603.0                                | 2124                      |
| Range              | 2393                    | 1369                     | 469.0                                | 1895                      |
| Mean               | 562.4                   | 1076                     | 275.5                                | 826.2                     |
| Std. Deviation     | 670.6                   | 213.3                    | 133.1                                | 564.9                     |
| Std. Error of Mean | 60.71                   | 19.23                    | 12.15                                | 92.86                     |
| Sum                | 68614                   |                          |                                      |                           |

**Table S3.** An overview of Temperature (°C) between Summer -March 2020-June 2020, Rainy -July 2020-October 2020, c) Winter - November 2020-February 2021, d) Summer - March 2020-April 2021 in Chennai, India.

|                       | March-June<br>2020(Summer) | July-October<br>2020(Rainy) | November 2020-February 2021<br>(Winter) | March-April 2021<br>(Summer) |
|-----------------------|----------------------------|-----------------------------|-----------------------------------------|------------------------------|
| Number of<br>values   | 116                        | 123                         | 120                                     | 43                           |
| Minimum               | 26.72                      | 25.92                       | 25.00                                   | 26.56                        |
| 25% Percentile        | 28.60                      | 29.70                       | 30.00                                   | 28.16                        |
| Median                | 30.31                      | 32.00                       | 30.00                                   | 34.00                        |
| 75% Percentile        | 31.48                      | 34.00                       | 31.00                                   | 35.00                        |
| Maximum               | 35.00                      | 37.00                       | 34.00                                   | 42.00                        |
| Range                 | 8.280                      | 11.08                       | 9.000                                   | 15.44                        |
| Mean                  | 30.24                      | 32.09                       | 30.19                                   | 32.86                        |
| Std. Deviation        | 1.770                      | 2.642                       | 1.657                                   | 4.128                        |
| Std. Error of<br>Mean | 0.1643                     | 0.2382                      | 0.1512                                  | 0.6296                       |

**Table S4.** An overview of wind speed (m/s) between Summer -March 2020-June 2020, Rainy - July 2020-October 2020, c) Winter - November 2020-February 2021, d) Summer - March 2020-April 2021 in Chennai, India.

|                       | March-June<br>2020(Summer) | July-October<br>2020(Rainy) | November 2020-February 2021<br>(Winter) | March-April 2021<br>(Summer) |
|-----------------------|----------------------------|-----------------------------|-----------------------------------------|------------------------------|
| Number of<br>values   | 116                        | 123                         | 120                                     | 43                           |
| Minimum               | 0.3200                     | 0.1200                      | 0.1900                                  | 0.1300                       |
| 25% Percentile        | 0.5000                     | 0.3000                      | 0.5725                                  | 0.2900                       |
| Median                | 0.7000                     | 0.3800                      | 1.040                                   | 0.3800                       |
| 75% Percentile        | 0.9875                     | 0.5000                      | 1.445                                   | 0.5400                       |
| Maximum               | 2.340                      | 1.200                       | 2.590                                   | 0.8800                       |
| Range                 | 2.020                      | 1.080                       | 2.400                                   | 0.7500                       |
| Mean                  | 0.8209                     | 0.4184                      | 1.069                                   | 0.4112                       |
| Std. Deviation        | 0.4106                     | 0.1689                      | 0.5413                                  | 0.1904                       |
| Std. Error of<br>Mean | 0.03812                    | 0.01523                     | 0.04941                                 | 0.02903                      |

**Table S5.** An overview of PM 2.5 ( $\mu\text{g}/\text{m}^3$ ) between Summer - March 2020-June 2020, Rainy - July 2020-October 2020, c) Winter - November 2020-February 2021, d) Summer - March 2020-April 2021 in Chennai, India.

|                    | March-June<br>2020(Summer) | July-October<br>2020(Rainy) | November 2020-February 2021<br>(Winter) | March-April 2021<br>(Summer) |
|--------------------|----------------------------|-----------------------------|-----------------------------------------|------------------------------|
| Number of values   | 116                        | 123                         | 120                                     | 43                           |
| Minimum            | 1.440                      | 6.760                       | 0.000                                   | 2.460                        |
| 25% Percentile     | 11.11                      | 18.14                       | 21.25                                   | 30.32                        |
| Median             | 17.65                      | 25.52                       | 37.21                                   | 40.97                        |
| 75% Percentile     | 27.67                      | 33.57                       | 48.70                                   | 46.94                        |
| Maximum            | 353.2                      | 108.3                       | 98.21                                   | 92.57                        |
| Range              | 351.8                      | 101.5                       | 98.21                                   | 90.11                        |
| Mean               | 27.09                      | 28.60                       | 37.66                                   | 42.10                        |
| Std. Deviation     | 41.55                      | 15.92                       | 19.46                                   | 19.05                        |
| Std. Error of Mean | 3.858                      | 1.435                       | 1.776                                   | 2.906                        |

**Table S6.** An overview of SO<sub>2</sub> ( $\mu\text{g}/\text{m}^3$ ) between Summer- March 2020-June 2020, Rainy- July 2020-October 2020, c) Winter- November 2020-February 2021, d) Summer- March 2020-April 2021 in Chennai, India.

|                    | March-June<br>2020(Summer) | July-October<br>2020(Rainy) | November 2020-February 2021<br>(Winter) | March-April 2021<br>(Summer) |
|--------------------|----------------------------|-----------------------------|-----------------------------------------|------------------------------|
| Number of values   | 116                        | 123                         | 120                                     | 43                           |
| Minimum            | 1.260                      | 1.840                       | 2.320                                   | 9.500                        |
| 25% Percentile     | 3.058                      | 3.030                       | 4.350                                   | 26.78                        |
| Median             | 3.900                      | 3.650                       | 6.595                                   | 28.76                        |
| 75% Percentile     | 4.703                      | 4.410                       | 8.238                                   | 30.71                        |
| Maximum            | 13.62                      | 21.72                       | 29.54                                   | 34.02                        |
| Range              | 12.36                      | 19.88                       | 27.22                                   | 24.52                        |
| Mean               | 4.133                      | 4.017                       | 6.925                                   | 28.26                        |
| Std. Deviation     | 1.762                      | 2.074                       | 3.711                                   | 4.108                        |
| Std. Error of Mean | 0.1636                     | 0.1870                      | 0.3388                                  | 0.6265                       |

**Table S7.** An overview of NO ( $\mu\text{g}/\text{m}^3$ ) between Summer- March 2020-June 2020, Rainy- July 2020-October 2020, c) Winter - November 2020-February 2021, d) Summer - March 2020-April 2021 in Chennai, India.

|                    | March-June<br>2020(Summer) | July-October<br>2020(Rainy) | November 2020-February 2021<br>(Winter) | March-April 2021<br>(Summer) |
|--------------------|----------------------------|-----------------------------|-----------------------------------------|------------------------------|
| Number of values   | 116                        | 123                         | 120                                     | 43                           |
| Minimum            | 1.600                      | 1.570                       | 0.8900                                  | 1.530                        |
| 25% Percentile     | 3.100                      | 2.370                       | 3.570                                   | 3.700                        |
| Median             | 4.160                      | 3.480                       | 4.230                                   | 7.690                        |
| 75% Percentile     | 11.38                      | 4.110                       | 4.468                                   | 11.28                        |
| Maximum            | 49.27                      | 35.08                       | 15.29                                   | 28.05                        |
| Range              | 47.67                      | 33.51                       | 14.40                                   | 26.52                        |
| Mean               | 7.966                      | 3.784                       | 4.181                                   | 9.274                        |
| Std. Deviation     | 8.637                      | 3.259                       | 1.768                                   | 6.921                        |
| Std. Error of Mean | 0.8019                     | 0.2938                      | 0.1614                                  | 1.055                        |

**Table S8.** An overview of BP (mmHg) between Summer- March 2020-June 2020, Rainy- July 2020-October 2020, c) Winter - November 2020-February 2021, d) Summer- March 2020-April 2021 in Chennai, India.

|                    | March-June<br>2020(Summer) | July-October<br>2020(Rainy) | November 2020-February 2021<br>(Winter) | March-April 2021<br>(Summer) |
|--------------------|----------------------------|-----------------------------|-----------------------------------------|------------------------------|
| Number of values   | 116                        | 123                         | 120                                     | 43                           |
| Minimum            | 742.8                      | 743.8                       | 751.3                                   | 749.3                        |
| 25% Percentile     | 747.5                      | 747.0                       | 760.6                                   | 758.7                        |
| Median             | 750.3                      | 748.2                       | 761.5                                   | 759.8                        |
| 75% Percentile     | 752.2                      | 749.4                       | 762.2                                   | 761.5                        |
| Maximum            | 754.3                      | 757.6                       | 763.7                                   | 762.6                        |
| Range              | 11.48                      | 13.81                       | 12.41                                   | 13.29                        |
| Mean               | 749.8                      | 749.0                       | 761.3                                   | 759.3                        |
| Std. Deviation     | 2.670                      | 3.104                       | 1.569                                   | 2.831                        |
| Std. Error of Mean | 0.2479                     | 0.2799                      | 0.1432                                  | 0.4317                       |
